# Supplementary material
Source: PubMed Central journal article supplement (PMC5278472)
Supplement: pnas.1613254114.sapp.pdf [file pnas.1613254114.sapp.pdf]

## Supplementary Figures

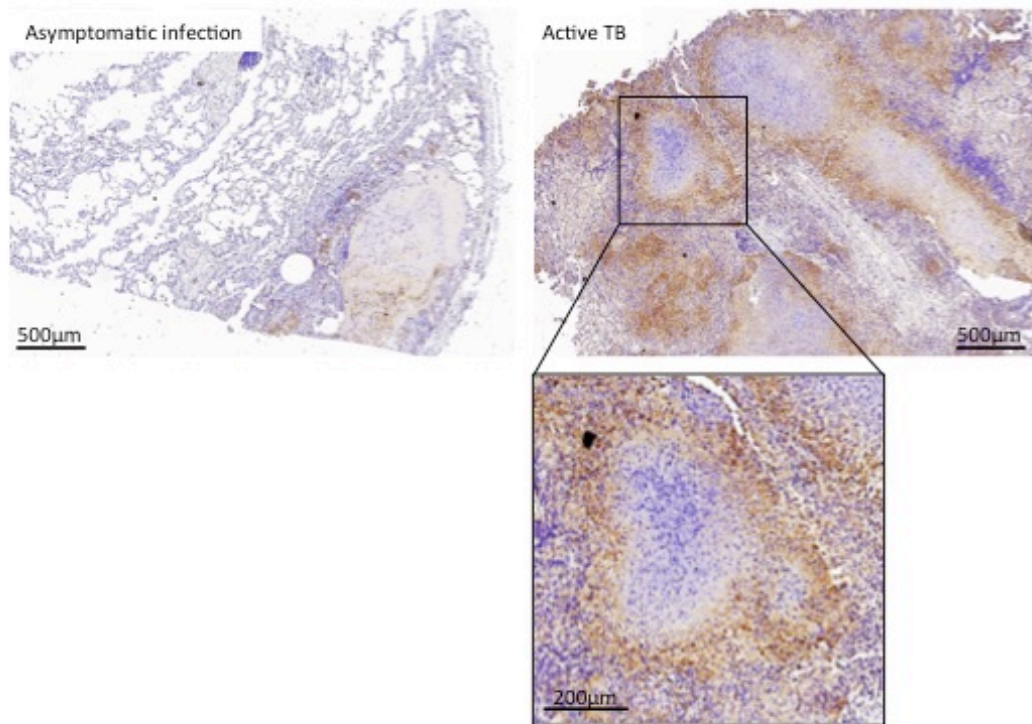

**Fig. S1** Immuno-histological analysis of DCIR expression in the lungs of *M. tuberculosis*-infected non-human primates (macaques) during asymptomatic infection (left panel) or active TB disease (right panels).

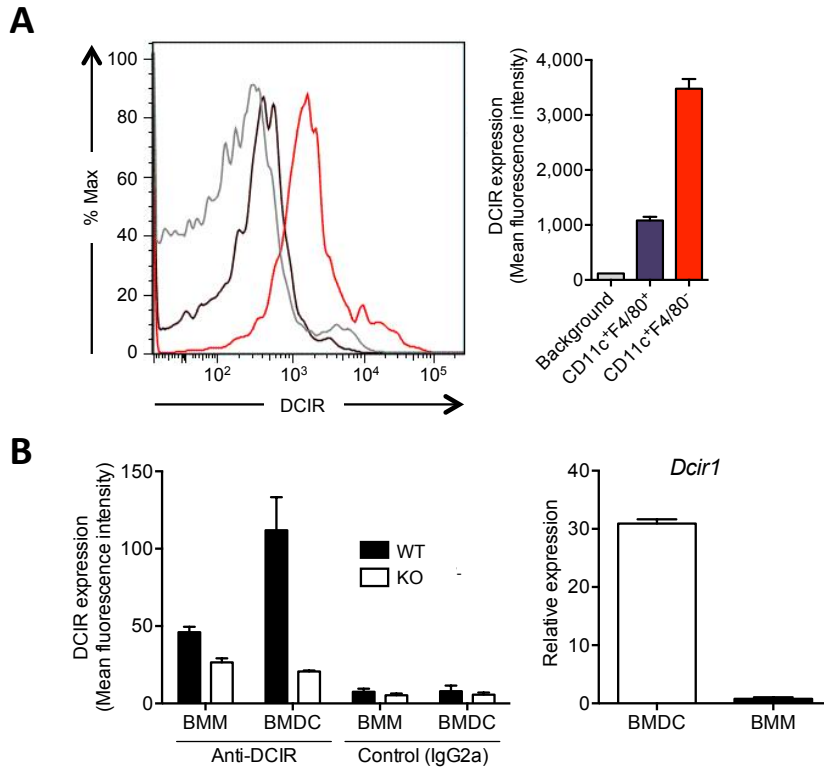

**Fig. S2** DCIR (*Dcir1*/*Clec4a2*) expression in mouse macrophages and DCs, and phenotypic characterization of DCIR-KO and WT DCs. (A) FACS analysis of DCIR expression in DC11c<sup>+</sup>F4/80<sup>+</sup> macrophages and CD11c<sup>+</sup>F4/80<sup>-</sup> DCs in the lungs of naïve mice. Left panel shows a representative FACS analysis (grey line, control isotype; dark line, macrophages; red line, DCs). Right panel shows DCIR mean fluorescence intensity as mean±s.e.m. of 4 biological replicates. (B) DCIR expression in mouse bone marrow-derived macrophages (BMM) or DCs (BMDC). Left panel shows DCIR mean fluorescence intensity in cells from WT or KO mice as mean±s.e.m. of 3 biological replicates. Right panel shows RT-qPCR quantification of the DCIR mRNA in BMDC and BMM as mean±s.e.m. of 3 biological replicates and is representative of 2 independent experiments. Statistical analysis was performed using Student's *t*-test; \**P*<0.05.

**A**

| GO biological process complete                                   | Reference list | Experiment | Expected | Fold enrichment | P-value  |
|------------------------------------------------------------------|----------------|------------|----------|-----------------|----------|
| positive regulation of phosphorylation (GO:0042327)              | 899            | 15         | 3.26     | 4.60            | 6.12E-03 |
| positive regulation of protein phosphorylation (GO:0001934)      | 857            | 14         | 3.11     | 4.50            | 1.92E-02 |
| positive regulation of phosphorus metabolic process (GO:0010562) | 1017           | 15         | 3.69     | 4.06            | 2.78E-02 |
| positive regulation of phosphate metabolic process (GO:0045937)  | 1017           | 15         | 3.69     | 4.06            | 2.78E-02 |
| locomotion (GO:0040011)                                          | 1027           | 15         | 3.73     | 4.02            | 3.13E-02 |
| regulation of multicellular organismal process (GO:0051239)      | 2621           | 25         | 9.51     | 2.63            | 2.93E-02 |
| positive regulation of biological process (GO:0048518)           | 5093           | 37         | 18.48    | 2.00            | 3.81E-02 |

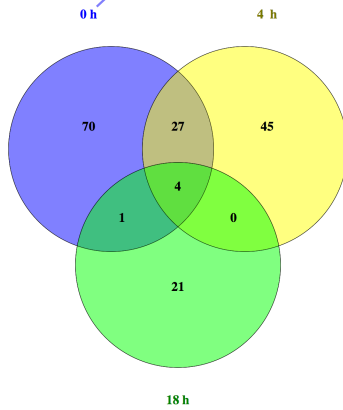

UP-regulated in DCIR-KO as compared to WT

**B**

| GO biological process complete                                                  | Reference list | Experiment | Expected | Fold enrichment | P-value  |
|---------------------------------------------------------------------------------|----------------|------------|----------|-----------------|----------|
| response to interferon-alpha (GO:0035455)                                       | 20             | 5          | .08      | 63.41           | 1.68E-04 |
| negative regulation of viral genome replication (GO:0045071)                    | 41             | 7          | .16      | 43.30           | 3.10E-06 |
| response to interferon-beta (GO:0035456)                                        | 36             | 6          | .14      | 42.27           | 6.72E-05 |
| defense response to virus (GO:0051607)                                          | 130            | 14         | .51      | 27.31           | 1.75E-12 |
| regulation of viral genome replication (GO:0045069)                             | 66             | 7          | .26      | 26.90           | 8.03E-05 |
| negative regulation of viral process (GO:0048525)                               | 81             | 8          | .32      | 25.05           | 1.18E-05 |
| negative regulation of viral life cycle (GO:1903901)                            | 77             | 7          | .30      | 23.06           | 2.28E-04 |
| response to virus (GO:0009615)                                                  | 173            | 15         | .68      | 21.99           | 3.22E-12 |
| negative regulation of multi-organism process (GO:0043901)                      | 159            | 9          | .63      | 14.36           | 1.28E-04 |
| regulation of viral process (GO:0050792)                                        | 146            | 8          | .58      | 13.90           | 1.07E-03 |
| regulation of viral life cycle (GO:1903900)                                     | 135            | 7          | .53      | 13.15           | 9.67E-03 |
| regulation of symbiosis, encompassing mutualism through parasitism (GO:0043903) | 177            | 8          | .70      | 11.46           | 4.51E-03 |
| innate immune response (GO:0045087)                                             | 458            | 20         | 1.81     | 11.08           | 1.11E-11 |
| immune effector process (GO:0002252)                                            | 388            | 15         | 1.53     | 9.81            | 3.03E-07 |
| defense response to other organism (GO:0098542)                                 | 487            | 15         | 1.92     | 7.81            | 6.73E-06 |
| regulation of multi-organism process (GO:0043900)                               | 419            | 11         | 1.65     | 6.66            | 6.82E-03 |
| response to other organism (GO:0051707)                                         | 737            | 17         | 2.91     | 5.85            | 3.39E-05 |
| response to external biotic stimulus (GO:0043207)                               | 737            | 17         | 2.91     | 5.85            | 3.39E-05 |
| immune response (GO:0006955)                                                    | 873            | 20         | 3.44     | 5.81            | 1.30E-06 |
| response to biotic stimulus (GO:0009607)                                        | 765            | 17         | 3.02     | 5.64            | 5.87E-05 |
| defense response (GO:0006952)                                                   | 1060           | 20         | 4.18     | 4.79            | 3.60E-05 |
| immune system process (GO:0002376)                                              | 1674           | 27         | 6.60     | 4.09            | 1.17E-06 |
| response to external stimulus (GO:0009605)                                      | 1559           | 22         | 6.15     | 3.58            | 9.51E-04 |
| multi-organism process (GO:0051704)                                             | 1641           | 22         | 6.47     | 3.40            | 2.30E-03 |

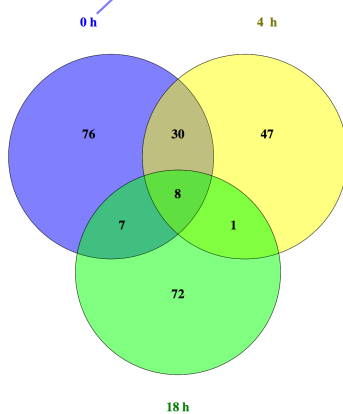

DOWN-regulated in DCIR-KO as compared to WT

| GO biological process complete         | Reference list | Experiment | Expected | Fold enrichment | P-value  |
|----------------------------------------|----------------|------------|----------|-----------------|----------|
| defense response to virus (GO:0051607) | 130            | 6          | .35      | 17.17           | 1.18E-02 |
| response to virus (GO:0009615)         | 173            | 7          | .47      | 15.05           | 3.57E-03 |
| immune system process (GO:0002376)     | 1674           | 17         | 4.50     | 3.78            | 9.93E-03 |

**Fig. S3** Venn diagram of genes up (A)- or down (B)-modulated in DCIR-deficient DCs, compared to in WT cells, at 0, 4 or 18 h after *M. tuberculosis* infection. The boxes show functional gene set enrichment analysis using Gene Ontology.

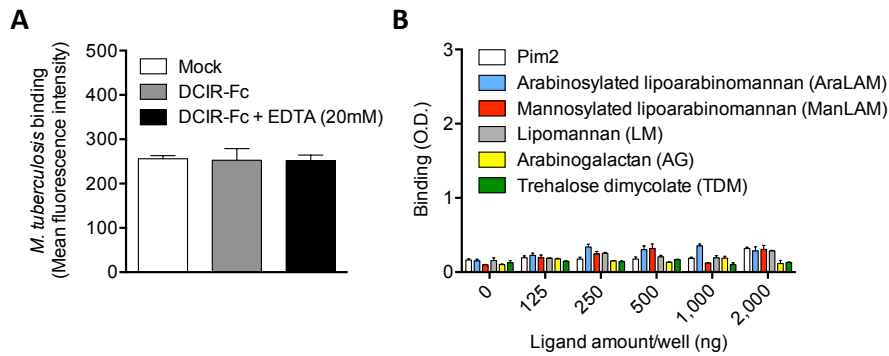

**Fig. S4** DCIR does not recognize *M. tuberculosis* or mycobacterial surface glycosylated ligands. (A) *M. tuberculosis* bacteria were incubated for 1 h at 37°C with DCIR-Fc (10µg/ml) in the presence or absence of EDTA, or in Lectin buffer (Mock). DCIR-Fc was immune-detected with a PE-coupled anti-human IgG antibody and binding was analyzed by FACS. (B) Different constituents of the mycomembrane, PIM<sub>2</sub>, AraLAM, ManLAM, LM, AG, and TDM were coated onto 96-well plates at different concentrations. The plates were then incubated with 10 µg/ml of chimeric DCIR-hFc at room temperature during 2 h. Binding was detected using a biotinylated polyclonal anti-human IgG and streptavidin-HRP. Colorimetry analysis was analyzed at 450 -570 nm using a spectrophotometer. Data are presented as mean±s.e.m. of at least 3 replicates, and are representative of at least 2 independent experiments.

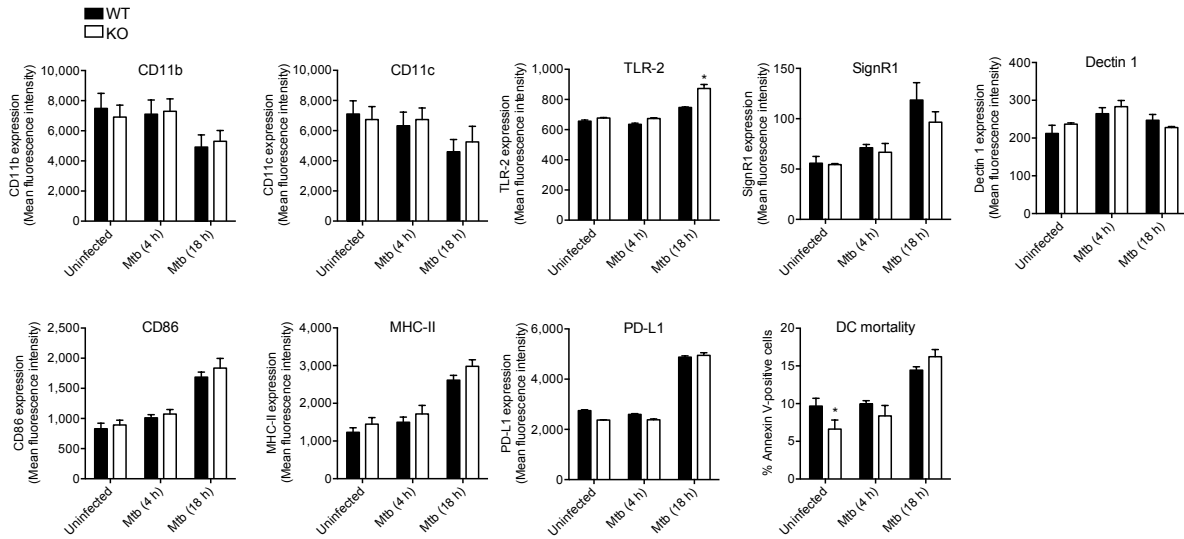

**Fig. S5** FACS quantification of receptors (CD11b, CD11c, TLR-2, SignR1, Dectin 1), molecules involved in T cell stimulation or inhibition (CD86, MHC-II, PDL-1), and mortality in BMDC during *M. tuberculosis* infection. Data are presented as mean±s.e.m. of 3 independent experiments. Statistical analysis was performed using Student's *t*-test; \* $P < 0.05$ .

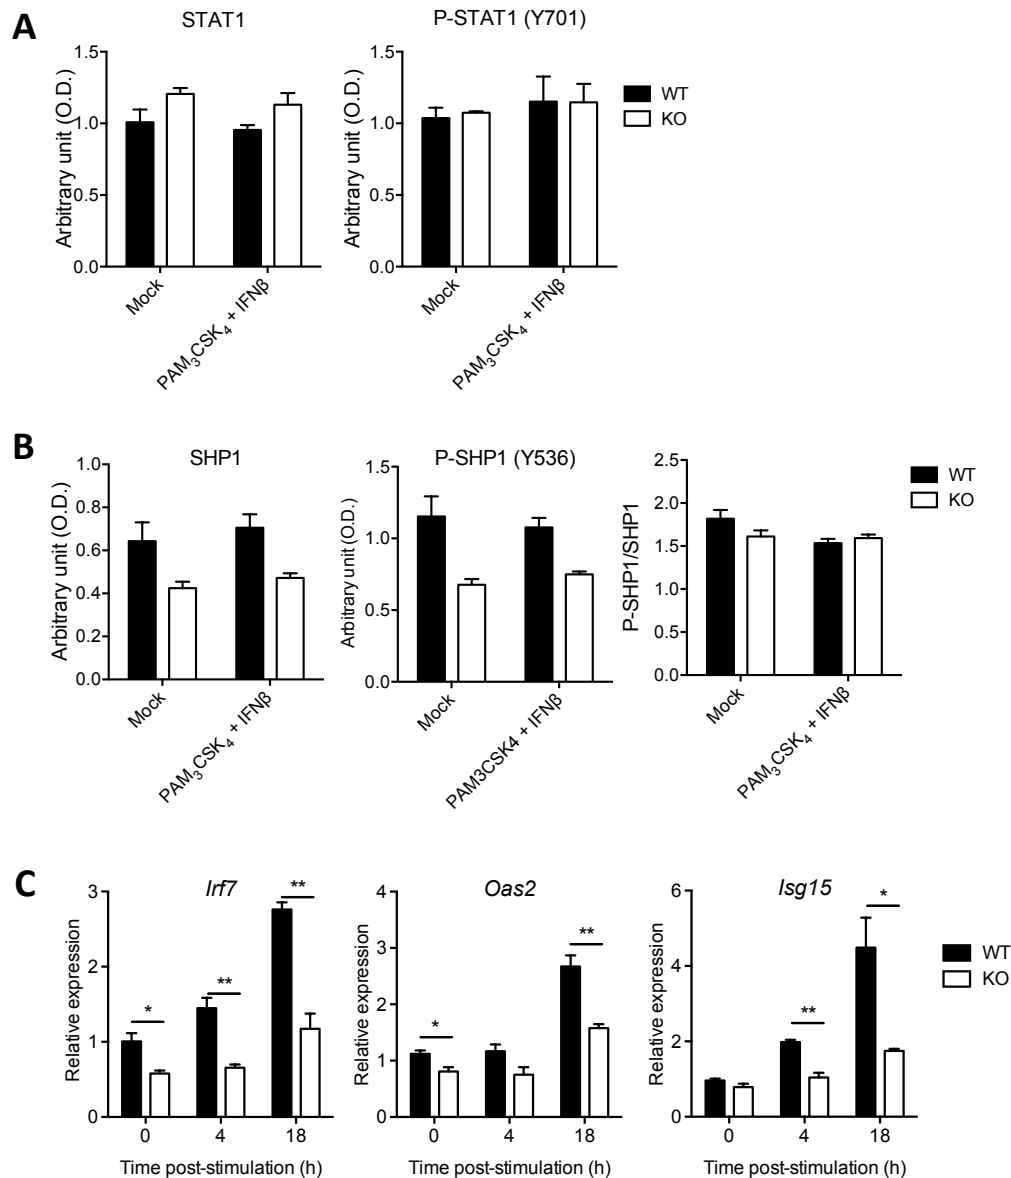

**Fig. S6** Analysis of the phosphorylation status of STAT1 (Tyr701) and SHP1 (Tyr536) and of type II IFN signaling in WT vs. KO cells. (A,B) WT or KO DCs were left unstimulated (Mock), or co-stimulated with the TLR2 agonist lipopeptide Pam<sub>3</sub>CSK<sub>4</sub> and IFN $\beta$  for 4 h, as indicated. STAT1 (A) and SHP1 (B), and their phosphorylated forms were quantified in cell lysates by ELISA. (C) WT or KO DCs were stimulated with 20 ng/ml IFN $\gamma$  for the indicated periods of time. Relative expression of the ISGs *Irf7*, *Oas2*, and *Isg15* was quantified by RT-qPCR. In all panels, data are presented as mean $\pm$ s.e.m. of at least 3 biological replicates. Statistical analysis was performed using Student's *t*-test; \**P*<0.05, \*\**P*<0.01.

**A**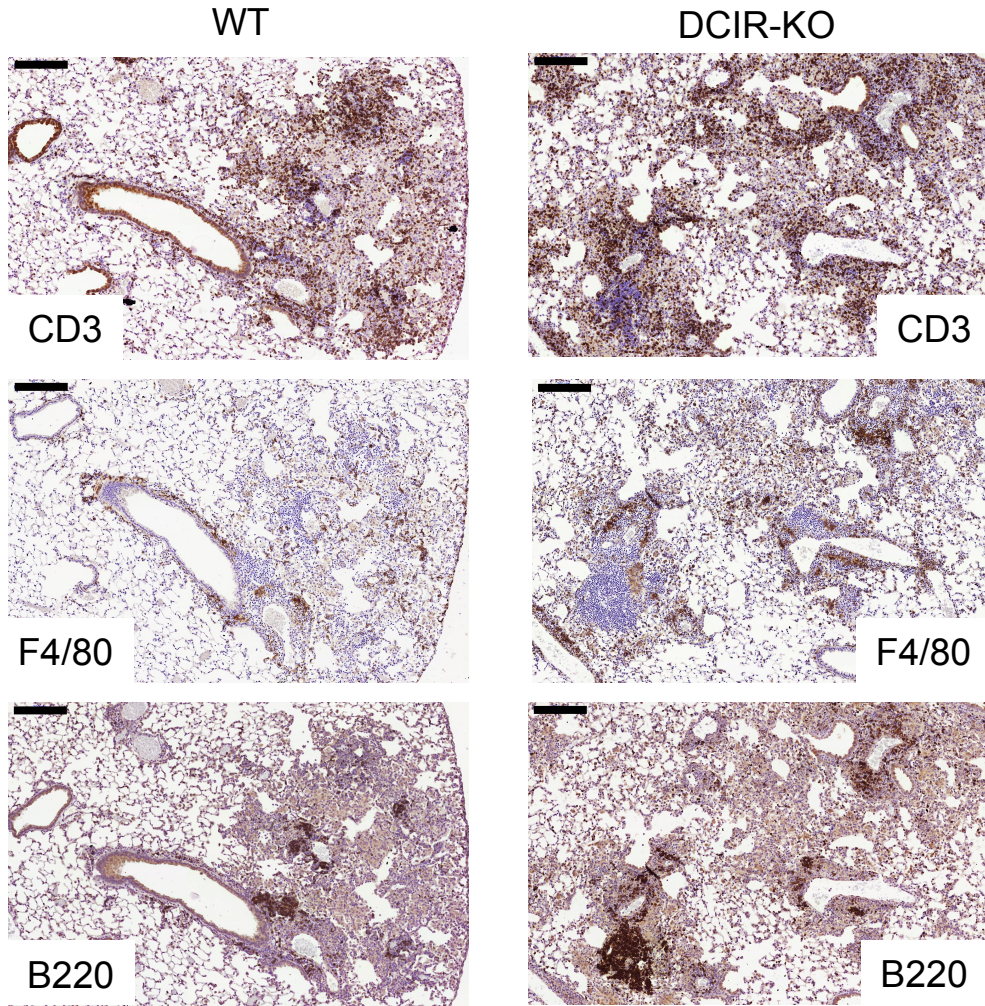**B**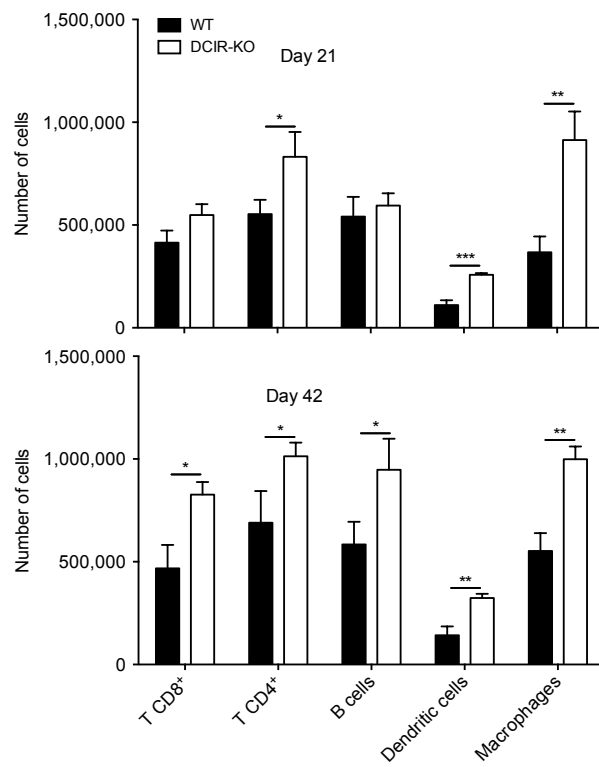

**Fig. S7** (A) Immuno-histological analysis of CD3-, B220- and F4/80-expressing T lymphocytes, B lymphocytes and macrophages, respectively, in the lungs of *M. tuberculosis*-infected WT or KO mice 42 days after infection. Bars correspond to 200  $\mu\text{m}$ . (B) Flow cytometry analysis of CD4<sup>+</sup> and CD8<sup>+</sup> T cells, B cells (CD19<sup>+</sup>), DCs (CD11b<sup>+</sup>CD11c<sup>+</sup>F4/80<sup>-</sup>) and macrophages (CD11b<sup>+</sup> F4/80<sup>+</sup>) in the lungs of *M. tuberculosis*-infected WT or KO mice 21 (top panel) or 42 (bottom panel) days after infection. Data show mean $\pm$ s.e.m. of 5 biological replicates. Statistical analysis was performed using Student's *t*-test; \* $P$ <0.05, \*\* $P$ <0.01, \*\*\* $P$ <0.001.



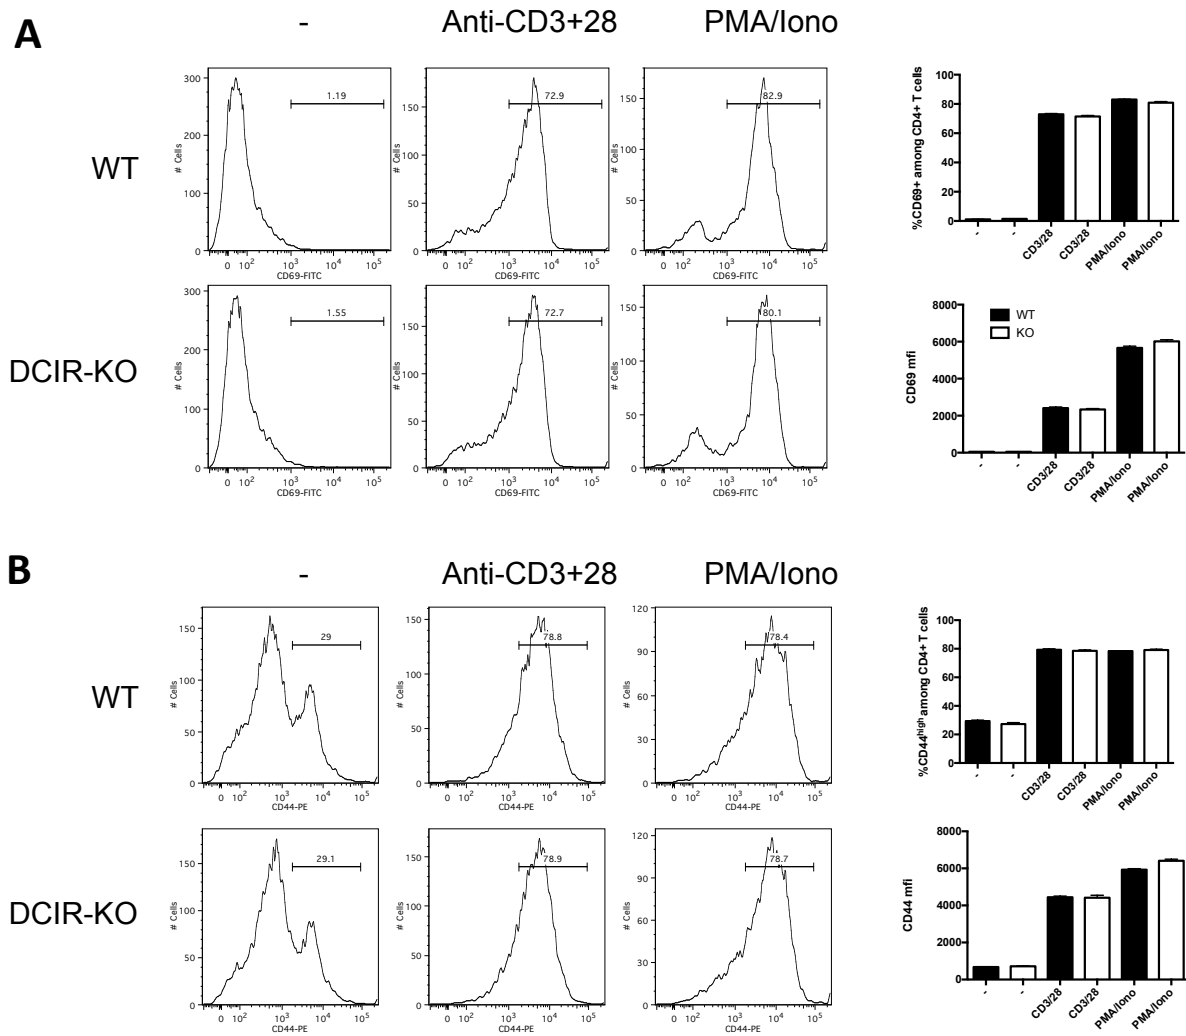

**Fig. S8 No intrinsic differences in activation of WT or DCIR KO T cells.** (A) CD4<sup>+</sup> T cells purified from the spleen of WT or KO mice were left unstimulated (-) or stimulated in vitro using anti-CD3+28 mAb or PMA/ionomycin then analyzed by flow cytometry for the upregulation of the CD69 activation marker. Flow cytometry histograms are representative examples of CD69 staining in the indicated conditions for WT (top panels) or KO (lower panels) CD4<sup>+</sup> T cells. Right histograms represent the quantification of the % CD69 cells among total CD4<sup>+</sup> T cells (top panel) or CD69 mfi (lower panel) on CD4<sup>+</sup> T cells for WT (black bars) or KO (white bars) T cells. (B) As in (A) except that CD44 expression was analyzed. Data are representative of 2 independent experiments performed in triplicates.

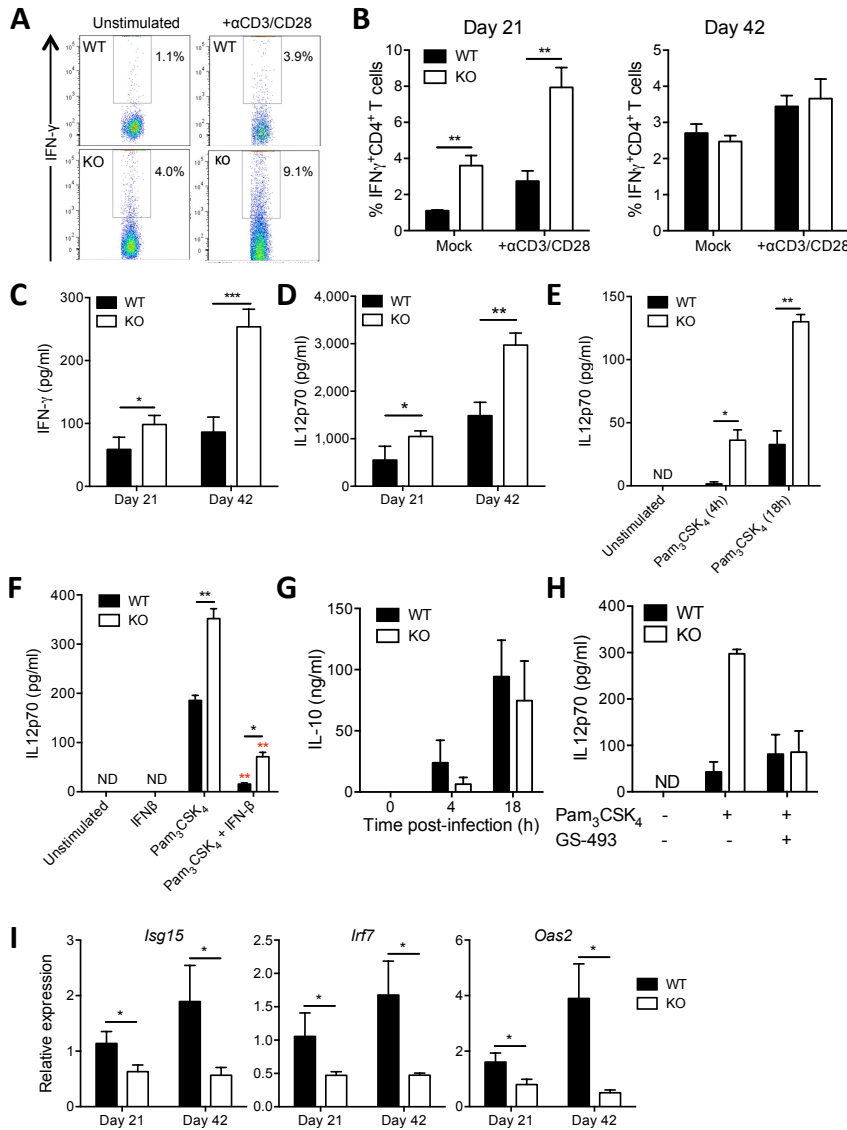

**Fig. S9** DCIR impairs anti-*M. tuberculosis* Th1 immunity in the LNs. Mice were infected as in Figure 3. (A,B) IFN $\gamma$ -producing CD4<sup>+</sup> Th1 cells were quantified by intracellular cytokine FACS staining after either stimulation with anti-CD3 and -CD28 antibodies or in the absence of restimulation (Mock), as indicated. A representative experiment at day 21 is depicted in (A). (B) represents analysis of 6 biological replicates. (C,D) ELISA quantification of total IFN $\gamma$  (C) or IL-12p70 (D) in LN lysates of infected mice. (E,F) ELISA quantification of IL-12p70 in bone marrow-derived DCs from WT or KO mice stimulated with the TLR-2 agonist Pam<sub>3</sub>CSK<sub>4</sub> in the absence (E) or presence (F) of IFN $\beta$ . In (F) cells were stimulated for 18 h. (G) ELISA quantification of IL-10 in *M. tuberculosis*-infected DCs after various periods of time. (H) ELISA quantification of IL-12p70 in bone marrow-derived DCs from WT or KO mice stimulated for 4 h with the TLR-2 agonist Pam<sub>3</sub>CSK<sub>4</sub> in the absence or presence

of the SHP2 inhibitor GS-493. (I) RT-qPCR quantification of gene expression of the ISGs *Isg15*, *Irf7* and *Oas2* in LN lysates of *M. tuberculosis*-infected WT or KO mice. In (C-I), data are presented as mean±s.e.m. of at least 3 biological replicates, and are representative of at least 2 independent experiments. Statistical analysis was performed using Student's *t*-test; \**P*<0.05, \*\**P*<0.01.

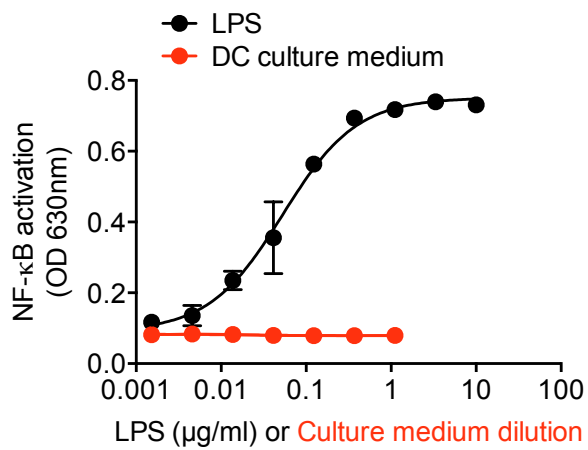

**Fig. S10** NF-κB activation in HEK-Blue™ TLR4 cells by various stimuli. Cells ( $5 \times 10^4$ ) were plated in 96-wells plates and stimulated at 37°C for 2h by the indicated doses of LPS or the indicated dilutions of DC culture medium (1 means pure culture medium). NF-κB activity was determined by reading OD at 630 nm.

## Supplementary Tables

**Table S1. List of IFN-stimulated genes (ISG) and –inhibited genes (IIG) genesets used for generating the Bubblemaps in Fig. 1B**

| ISG_geneset | IIG_geneset   |
|-------------|---------------|
| Ly6a        | Scd2          |
| Irf7        | Emb           |
| Usp18       | Serpinb1a     |
| Ifit2       | Elovl6        |
| Ctse        | Gde1          |
| Ifi204      | Gbp2b         |
| Csprs       | Enc1          |
| Ifi44       | Tle1          |
| Ifi2712a    | Brix1         |
| Eif2ak2     | 1600029D21Rik |
| Cxcr4       | Sgms1         |
| Cmpk2       | Snx24         |
| Slfn8       | Gcsh          |
| Slfn5       | Fcgr2b        |
| Ai607873    | Ado           |
| Xaf1        | Hepacam2      |
| Rtp4        | Lyz1          |

|               |               |
|---------------|---------------|
| Oas1c         | Setp03        |
| Isg20         | Xpot          |
| Rsad2         | Polr3g        |
| Oas1a         | Bst1          |
| Oas2          | Ppargc1b      |
| Loc667373     | Ctsl          |
| Ddx58         | Acsl3         |
| Pydc4         | Pgm2L1        |
| Pydc3         | Ppp1R3d       |
| I830012O16Rik | Sod2          |
| Ifit1         | Cpd           |
| Spon1         | Znrf2         |
| Mx1           | Ccbl2         |
| Asprv1        | Ptpla         |
| Oasl2         | Btg2          |
| Apod          | 5430435G22Rik |
| Parp9         | Ppfia4        |
| Fap           | 1300007C21Rik |
| Il18          | Zfp236        |
| Il15          | Fcgr3         |
| Nat5          | Loc622147     |

|         |  |
|---------|--|
| Slfn1   |  |
| Sct     |  |
| Ms4a6b  |  |
| Ms4a4d  |  |
| Daxx    |  |
| Asb13   |  |
| Stk39   |  |
| Pttg1   |  |
| Sgcb    |  |
| Mx2     |  |
| St8Sia1 |  |
| Abcb1a  |  |
| Etnk1   |  |
| Tkt11   |  |
| Ms4a4c  |  |
| Lgals9  |  |
| Car13   |  |
| Trim34b |  |
| Ly6c2   |  |
| Slfn3   |  |
| Stat2   |  |

|               |  |
|---------------|--|
| Tor3a         |  |
| Oprd1         |  |
| Sp100-rs      |  |
| H2-T24        |  |
| Loc270335     |  |
| Gjb2          |  |
| Ildr1         |  |
| Rpl39l        |  |
| Ms4a4b        |  |
| Oas1l         |  |
| 1600014C10Rik |  |
| Tmem219       |  |
| Loc432823     |  |
| Pgap2         |  |
| Wdfy1         |  |
| Trim34a       |  |
| Oas1b         |  |
| Oas3          |  |
| Trim25        |  |
| Mitd1         |  |
| Ifih1         |  |



|               |  |
|---------------|--|
| Tdrd7         |  |
| Parp12        |  |
| Znfx1         |  |
| Slfn4         |  |
| Dopey2        |  |
| Zc3hav1       |  |
| Pvrl4         |  |
| Dck           |  |
| Pik3ap1       |  |
| 9030607L20Rik |  |
| Hmgn3         |  |
| Herc6         |  |
| Parp14        |  |
| Mthfr         |  |
| Frmd4a        |  |
| Sp100         |  |
| Mxd1          |  |
| Pyhin1        |  |
| Helz2         |  |
| C130026I21Rik |  |
| Trim30d       |  |

|               |  |
|---------------|--|
| Bc147527      |  |
| Aw011738      |  |
| 9530028C05    |  |
| Cdc42bpg      |  |
| 5230400M03Rik |  |
| B430306N03Rik |  |
| Fam46a        |  |
| Phf11d        |  |
| Adar          |  |
| Chic1         |  |
| Synj1         |  |
| Loc240327     |  |
| G530011O06Rik |  |
| Lrp8          |  |
| Ppm1k         |  |
| Hsh2d         |  |
| Serinc4       |  |
| 2010109K09Rik |  |
| D130084N16Rik |  |
| Samhd1        |  |
| Pnpt1         |  |

|           |  |
|-----------|--|
| Loc665317 |  |
| Usp25     |  |
| Atp10a    |  |
| Rilp11    |  |
| Pml       |  |
| Ifi203    |  |
| Kdr       |  |
| Ehd4      |  |
| H2-T10    |  |
| Ms4a6c    |  |
| Xdh       |  |
| Nt5C3     |  |
| Rab711    |  |
| Ddx60     |  |
| Tcstv3    |  |
| Trim30a   |  |
| Ankle2    |  |
| Rnf213    |  |
| Whsc111   |  |
| Fndc3a    |  |
| Pou3f1    |  |

|        |  |
|--------|--|
| Samd91 |  |
|--------|--|

**Table S2. Primers used for RT-qPCR experiments**

| <b>Gene</b>                  | <b>Forward primer (5'-3')</b> | <b>Reverse primer (5'-3')</b> |
|------------------------------|-------------------------------|-------------------------------|
| <i>Hprt</i>                  | GTTCTTTGCTGACCTGCTGGAT        | CCCCGTTGACTGATCATTACAG        |
| <i>Irf7</i>                  | ACTTCAGCACTTCTTCCGAGAAC       | AGGTAGATGGTGTAGTGTGGTGAC      |
| <i>Isg15</i>                 | AGCAATGGCCTGGGACCTAAAG        | AGTCACGGACACCAGGAAATCG        |
| <i>Ifit1</i>                 | AGCAGAGAGTCAAGGCAGGTTC        | TGGTCACCATCAGCATTCTCTCC       |
| <i>Oas2</i>                  | AAAGTCCTGAAGACCGTCAAGGG       | ACAACAATGTCAGCATCTGATCCC      |
| <i>Cxcl9</i>                 | AGCAGTGTGGAGTTCGAGGAAC        | AGGGATTTGTAGTGGATCGTGC        |
| <i>Tnfsf10</i>               | GCTGTGTCTGTGGCTGTGACTTAC      | TCATCCGTCTTTGAGAAGCAAGC       |
| <i>Ccl2</i>                  | CCACTCACCTGCTGCTACTCATT       | TTCCTTCTGGGGTCAGCACAGA        |
| <i>Ifn<math>\beta</math></i> | GCACTGGGTGGAATGAGACT          | AGTGGAGAGCAGTTGAGGACA         |
| <i>Ifna</i>                  | TCTGATGCAGCAGGTGGG            | AGGGCTCTCCAGACTTCTGCTCTG      |
| <i>Tnfa</i>                  | CAAAATTCGAGTGACAAGCCTGT       | CCACTTGGTGGTTTGCTACGA         |
| <i>Nos2</i>                  | TCCTCACGCTTGGGTCTTGTTT        | TCCAACGTTCTCCGTTCTCTTGC       |
| <i>Mrc1</i>                  | AATGCCAAAAATTATTGATCGTG       | ACGGTGACCACTCCTGCTG           |
| <i>Ym1</i>                   | TACCCTATGCCTATCAGGGTAAT       | CCTTGAGCCACTGAGCCTTC          |
| <i>Arg1</i>                  | AATGAAGAGCTGGCCTGGTGTGGT      | ATGCTTCCAAGTCCAGACTGTG        |

**Table S3. Histopathological scoring of TB lesions in NHPs**

|                                   | Type of lesions | Granuloma Size | Type of granuloma                                                     | Distribution pattern         | Cellular composition                                                | Notes                                                                                            |
|-----------------------------------|-----------------|----------------|-----------------------------------------------------------------------|------------------------------|---------------------------------------------------------------------|--------------------------------------------------------------------------------------------------|
| Asymptomatic infection<br><br>#46 | Granulomatous   | Small          | Non-necrotizing                                                       | Focal                        | - Lymphocytic cuff (1)<br>- Epithelioid Mφ<br>- Fibrosis (+++)      | 1: with few plasma cells                                                                         |
| Active TB<br><br>#55              | Granulomatous   | Medium         | Caseous (admixed with some PMN)<br><br>Non-necrotizing<br><br>(Mixed) | Multifocal<br><br>coalescing | - Lymphocytic cuff (1)<br>- Epithelioid & foamy Mφ (2)<br><br>- MGC | 1: with plasma cells<br><br>2: presence of foamy Mφ in the alveoli in the vicinity of granulomas |

Abbreviations: Mφ: Macrophages; MGC: Multinucleated giant cells, PMN: Polymorphonuclear neutrophils.

**Table S4. Antibodies used for histological analysis**

| Antigen    | Clone / Number               | Supplier          | Dilution | Incubation time | Antigen retrieval                  |
|------------|------------------------------|-------------------|----------|-----------------|------------------------------------|
| DCIR       | Rabbit polyclonal, HPA007842 | Sigma-Aldrich     | 1/200    | 1 h             | HIER/Citrate pH6/MO*               |
| CD45R/B220 | RA3-6B2 Rat mAb              | Bio-Rad           | 1/400    | 1 h             | HIER/ Citrate pH6/MO*              |
| CD3        | SP7 Rabbit mAb               | Spring Bioscience | 1/100    | 1 h             | HIER/ Tris-EDTA pH9/WB             |
| F4/80      | CI:A3-1 Rat mAb              | Bio-Rad           | 1/100    | 1 h             | Proteinase K proteolytic digestion |
| T-bet      | 4B10, Mouse mAb              | BioLegend         | 1/100    | 1 h             | HIER/Tris-EDTA pH8/MO**            |

Abbreviations: mAb : monoclonal antibody; Ab: antibody; HIER: Heat-induced epitope retrieval.;

MO : Boiling in microwave oven twice 10 minutes each/MO\* or 7 minutes/MO\*\*; WB: Heating in water-bath at 95°C for 40 minutes.
